# Supplementary material for: The Role of Aquaculture and Capture Fisheries in Meeting Food and Nutrition Security: Testing a Nutrition-Sensitive Pond Polyculture Intervention in Rural Zambia
Source: MDPI journal article supplement (doi:10.3390/foods11091334), 2022-05-04
Supplement: s1 [file s1]

### Supplementary Figure S1 (S1): Species screening and selection process (2016–2019)

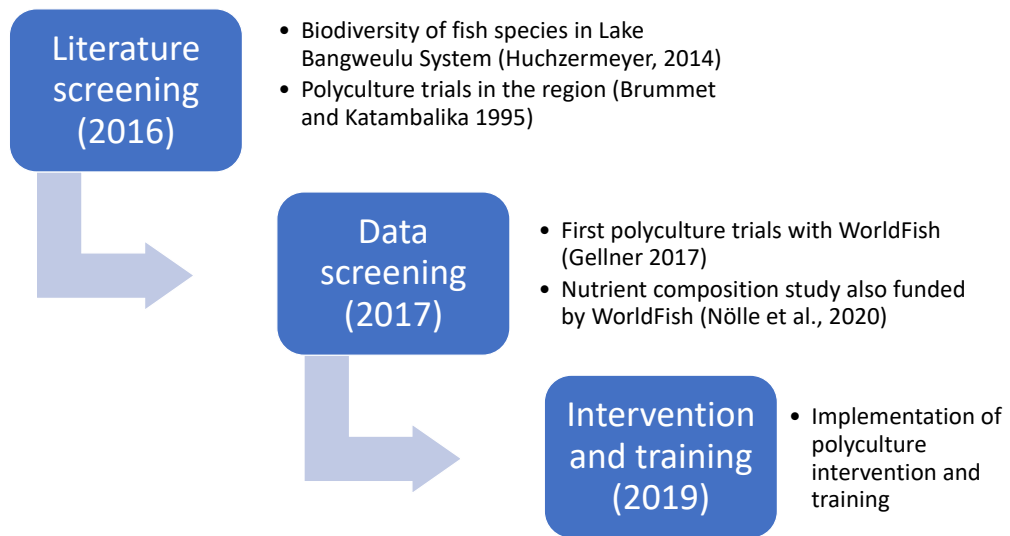

**Supplementary Table S1 (S2): Recommended Nutrient Intake (RNI) for females in five age groups for 13 nutrients in grams (g)**

| Nutrient                         | Toddler<br>1–3 years | Children A<br>4–6 years | Children B<br>7–9 years | Adolescent<br>10–18 years | Adult<br>19–50 years |
|----------------------------------|----------------------|-------------------------|-------------------------|---------------------------|----------------------|
| Protein (g) <sup>1</sup>         | 13                   | 19                      | 34                      | 46                        | 46                   |
| Fat (g)                          | 29                   | 34.8                    | 40.6                    | 69.6                      | 58                   |
| n-3 fatty acids (g) <sup>2</sup> | 1.25                 | 1.75                    | 1.75                    | 3                         | 2.5                  |
| Riboflavin (g)                   | 0.0005               | 0.0006                  | 0.0009                  | 0.0011                    | 0.0011               |
| Niacin (g)                       | 0.006                | 0.008                   | 0.012                   | 0.016                     | 0.014                |
| Folate (g)                       | 0.00015              | 0.0002                  | 0.0003                  | 0.0004                    | 0.0004               |
| Vit_B12 (g)                      | 0.0000009            | 0.0000012               | 0.0000018               | 0.0000024                 | 0.0000024            |
| Ca (g)                           | 0.5                  | 0.6                     | 0.7                     | 1.3                       | 1                    |
| Fe (g) <sup>3</sup>              | 0.0058               | 0.0063                  | 0.0089                  | 0.031                     | 0.0294               |
| Zn (g) <sup>4</sup>              | 0.0041               | 0.0048                  | 0.0056                  | 0.0072                    | 0.0049               |
| K (g) <sup>5</sup>               | 2                    | 2.3                     | 2.3                     | 2.3                       | 2.6                  |
| Mg (g)                           | 0.06                 | 0.076                   | 0.1                     | 0.22                      | 0.22                 |
| Se (g)                           | 0.000017             | 0.000022                | 0.000021                | 0.000026                  | 0.000026             |

<sup>1</sup> Based on grams per kg of body weight, e.g., for adults 0.8 g/kg body weight for the reference body weight (NASEM 2005)

<sup>2</sup> Calculated as 1.25 E% of female in age group, recommended intake is 0.5-2 E% and refers to the adult population (age ≥ 18 years of age): 1000 kcal for toddler, 1400 kcal for Child A, 1400 kcal for Child B, 2400 kcal, for adolescents, 2000 kcal for adults.

<sup>3</sup> Based on 10% bioavailability

<sup>4</sup> Based on Moderate bioavailability

<sup>5</sup> Based on Adequate Intake (AI) for potassium from NASEM (2019).

**Supplementary Table S2 (S3): Nutrient composition of fish species by form (source: Nölle et al., 2020)**

| Species           | Form from survey | Form of fish in lab | Substitute Species | Portion (100 g) | Protein (g) | Fat (g) | Water (g) | ALA (% of fat) | EPA (% of fat) | FHA (% of fat) | Riboflavin (mg) | Niacin (mg) | Folate (mcg) | Vit B12 (mcg) | Calcium (mg) | Iron (mg) | zinc (mg) | Potassium (mg) | Magnesium (mg) | Selenium (mcg) |
|-------------------|------------------|---------------------|--------------------|-----------------|-------------|---------|-----------|----------------|----------------|----------------|-----------------|-------------|--------------|---------------|--------------|-----------|-----------|----------------|----------------|----------------|
| B. trimaculatus   | Fresh            | Fresh               | B. radiatus        | whole           | 21.8        | 8.6     | 65.3      | 2.2            | 0.7            | 1.3            | 0.1             | 1.8         | 21.7         | 14.9          | 1324.4       | 6.7       | 5.2       | 282.5          | 56.1           | 43.9           |
|                   | Dried            | Dry                 | None               | whole           | 56.2        | 23.6    | 8.9       | 1.5            | 0.4            | 1.7            | 0.1             | 4.9         | 52.4         | 30.6          | 3001.3       | 11.3      | 12.1      | 920.7          | 131.0          | 100.7          |
|                   | Smoked           | Dry                 | None               | whole           | 56.2        | 23.6    | 8.9       | 1.5            | 0.4            | 1.7            | 0.1             | 4.9         | 52.4         | 30.6          | 3001.3       | 11.3      | 12.1      | 920.7          | 131.0          | 100.7          |
| Catfish           | Fresh            | Fresh               | None               | filleted        | 16.5        | 1.4     | 81.4      | 2.5            | 0.4            | 2.9            | 0.1             | 2.9         | 20.7         | 3.9           | 10.2         | 0.7       | 0.7       | 296.3          | 21.5           | 36.4           |
|                   | Dried            | Dry                 | None               | filleted        | 67.9        | 19.1    | 9.1       | 3.3            | 1.1            | 2.0            | 0.2             | 8.4         | 48.9         | 33.8          | 482.8        | 9.0       | 3.1       | 1243.5         | 104.7          | 222.4          |
|                   | Smoked           | Smoked              | None               | filleted        | 29.8        | 2.8     | 66.8      | 1.5            | 0.2            | 2.7            | 0.1             | 4.3         | 21.6         | 5.3           | 15.1         | 13.7      | 1.5       | 500.0          | 29.5           | 43.0           |
| L. miodon         | Fresh            | Fresh               | None               | gutted          | 16.5        | 1.8     | 77.6      | 2.4            | 2.8            | 7.8            | 0.1             | 3.6         | 14.1         | 9.7           | 823.8        | 2.9       | 3.7       | 340.4          | 41.6           | 35.4           |
|                   | Dried            | Dry                 | None               | whole           | 67.5        | 11.0    | 9.0       | 3.4            | 3.9            | 7.8            | 0.4             | 20.7        | 63.0         | 41.1          | 2713.8       | 9.1       | 13.4      | 1421.3         | 162.7          | 158.5          |
|                   | Smoked           | Dry                 | None               | whole           | 67.5        | 11.0    | 9.0       | 3.4            | 3.9            | 7.8            | 0.4             | 20.7        | 63.0         | 41.1          | 2713.8       | 9.1       | 13.4      | 1421.3         | 162.7          | 158.5          |
| L. stappersii     | Fresh            | Fresh               | None               | filleted        | 23.2        | 2.4     | 73.7      | 0.9            | 0.7            | 2.6            | 0.1             | 7.6         | 14.0         | 5.6           | 30.1         | 0.8       | 0.6       | 326.4          | 28.1           | 128.2          |
|                   | Dried            | Smoked              | M. Lacerde         | body            | 64.1        | 22.8    | 9.8       | 2.7            | 0.7            | 6.9            | 0.3             | 4.0         | 44.0         | 3.8           | 1169.3       | 3.7       | 5.0       | 806.1          | 84.1           | 107.7          |
|                   | Smoked           | Smoked              | M. Lacerde         | body            | 64.1        | 22.8    | 9.8       | 2.7            | 0.7            | 6.9            | 0.3             | 4.0         | 44.0         | 3.8           | 1169.3       | 3.7       | 5.0       | 806.1          | 84.1           | 107.7          |
| M. longirostris   | Fresh            | Fresh               | None               | filleted        | 13.6        | 2.5     | 83.4      | 1.1            | 1.6            | 2.4            | 0.1             | 0.5         | 5.6          | 2.6           | 37.2         | 0.5       | 0.4       | 159.5          | 16.7           | 25.4           |
|                   | Dried            | Smoked              | M. Lacerde         | body            | 64.1        | 22.8    | 9.8       | 2.7            | 0.7            | 6.9            | 0.3             | 4.0         | 44.0         | 3.8           | 1169.3       | 3.7       | 5.0       | 806.1          | 84.1           | 107.7          |
|                   | Smoked           | Smoked              | M. Lacerde         | body            | 64.1        | 22.8    | 9.8       | 2.7            | 0.7            | 6.9            | 0.3             | 4.0         | 44.0         | 3.8           | 1169.3       | 3.7       | 5.0       | 806.1          | 84.1           | 107.7          |
| M. macrolepidotus | Fresh            | Fresh               | None               | filleted        | 17.1        | 8.1     | 71.9      | 2.5            | 0.6            | 1.1            | 0.4             | 1.3         | 7.4          | 4.8           | 692.2        | 1.2       | 3.4       | 291.0          | 35.7           | 34.0           |
|                   | Dried            | Dry                 | None               | gutted          | 66.0        | 12.1    | 10.5      | 3.5            | 1.0            | 2.2            | 0.7             | 4.9         | 84.1         | 52.8          | 2882.5       | 20.0      | 13.8      | 1156.5         | 151.8          | 149.4          |
|                   | Smoked           | Dry                 | None               | gutted          | 66.0        | 12.1    | 10.5      | 3.5            | 1.0            | 2.2            | 0.7             | 4.9         | 84.1         | 52.8          | 2882.5       | 20.0      | 13.8      | 1156.5         | 151.8          | 149.4          |
| O. macrochir      | Fresh            | Fresh               | None               | filleted        | 18.4        | 1.4     | 79.3      | 1.7            | 0.2            | 2.3            | 0.1             | 4.0         | 6.0          | 2.3           | 41.9         | 0.4       | 1.2       | 335.1          | 23.6           | 19.5           |
|                   | Smoked           | Smoked              | T. Rendalli        | body            | 67.3        | 10.5    | 19.7      | 1.4            | 0.0            | 0.1            | 0.7             | 12.5        | 33.7         | 4.3           | 323.1        | 1.8       | 4.9       | 1116.8         | 84.3           | 105.6          |
| P. acutirois      | Dried            | Dry                 | T. sparmanii       | whole           | 57.3        | 19.7    | 7.7       | 5.2            | 0.5            | 1.9            | 1.0             | 6.6         | 42.2         | 29.6          | 3463.8       | 38.0      | 9.4       | 1083.7         | 136.9          | 44.5           |
|                   | Fresh            | Fresh               | L. miodon          | whole           | 16.5        | 1.8     | 77.6      | 2.4            | 2.8            | 7.8            | 0.1             | 3.6         | 14.1         | 9.7           | 823.8        | 2.9       | 3.7       | 340.4          | 41.6           | 35.4           |

|                    |        |        |                          |          |      |      |      |     |     |     |     |      |       |      |        |      |      |        |       |       |
|--------------------|--------|--------|--------------------------|----------|------|------|------|-----|-----|-----|-----|------|-------|------|--------|------|------|--------|-------|-------|
| P. philander       | Dried  | Dry    | None                     | whole    | 67.9 | 12.7 | 7.3  | 3.4 | 3.7 | 8.6 | 0.2 | 7.3  | 53.3  | 25.0 | 2975.3 | 22.1 | 19.3 | 1325.5 | 171.2 | 106.5 |
|                    | Smoked | Dry    | None                     | whole    | 67.9 | 12.7 | 7.3  | 3.4 | 3.7 | 8.6 | 0.2 | 7.3  | 53.3  | 25.0 | 2975.3 | 22.1 | 19.3 | 1325.5 | 171.2 | 106.5 |
|                    | Fresh  | Fresh  | T. Rendalli / sparrmanii | filleted | 19.7 | 1.2  | 78.6 | 4.1 | 0.6 | 3.0 | 0.1 | 2.3  | 9.2   | 1.5  | 54.9   | 0.4  | 1.0  | 226.1  | 21.5  | 132.2 |
| S. angusticeps     | Dried  | Dry    | None                     | whole    | 57.0 | 17.3 | 8.7  | 2.7 | 1.3 | 4.4 | 0.8 | 8.1  | 31.1  | 9.2  | 4361.0 | 17.3 | 10.9 | 1134.8 | 168.7 | 65.7  |
|                    | Smoked | Dry    | None                     | whole    | 57.0 | 17.3 | 8.7  | 2.7 | 1.3 | 4.4 | 0.8 | 8.1  | 31.1  | 9.2  | 4361.0 | 17.3 | 10.9 | 1134.8 | 168.7 | 65.7  |
|                    | Fresh  | Fresh  | None                     | filleted | 17.7 | 0.8  | 80.9 | 1.1 | 0.2 | 2.7 | 0.1 | 1.6  | 23.3  | 0.9  | 19.9   | 0.2  | 0.6  | 314.1  | 24.2  | 23.9  |
| S. mellandi        | Dried  | Smoked | S. Robustus              | body     | 76.9 | 6.8  | 13.5 | 1.9 | 0.3 | 6.2 | 0.3 | 6.9  | 27.6  | 8.6  | 527.5  | 1.6  | 3.2  | 1128.2 | 96.1  | 99.8  |
|                    | Smoked | Smoked | S. Robustus              | body     | 76.9 | 6.8  | 13.5 | 1.9 | 0.3 | 6.2 | 0.3 | 6.9  | 27.6  | 8.6  | 527.5  | 1.6  | 3.2  | 1128.2 | 96.1  | 99.8  |
|                    | Fresh  | Fresh  | None                     | whole    | 18.0 | 4.2  | 73.9 | 2.6 | 0.8 | 2.5 | 0.2 | 2.2  | 27.1  | 4.5  | 1028.4 | 3.0  | 2.2  | 260.5  | 42.8  | 38.8  |
| S. mystus          | Dried  | Smoked | None                     | body     | 70.4 | 15.6 | 12.0 | 1.1 | 0.2 | 0.8 | 0.8 | 9.3  | 46.7  | 12.1 | 899.1  | 3.0  | 4.6  | 1081.7 | 102.0 | 116.3 |
|                    | Smoked | Smoked | None                     | body     | 70.4 | 15.6 | 12.0 | 1.1 | 0.2 | 0.8 | 0.8 | 9.3  | 46.7  | 12.1 | 899.1  | 3.0  | 4.6  | 1081.7 | 102.0 | 116.3 |
|                    | Fresh  | Fresh  | A. occidentalis          | filleted | 17.0 | 1.1  | 81.5 | 2.0 | 1.5 | 2.3 | 0.1 | 3.1  | 19.2  | 2.5  | 13.7   | 0.4  | 0.4  | 280.8  | 20.3  | 15.2  |
| Synodontis spp     | Dried  | Dry    | S. intermedius           | body     | 59.6 | 9.5  | 10.4 | 4.0 | 1.3 | 4.5 | 0.2 | 6.4  | 125.0 | 24.0 | 2781.2 | 9.1  | 6.6  | 1157.2 | 142.9 | 143.8 |
|                    | Smoked | Smoked | S. intermedius           | body     | 62.0 | 20.8 | 13.7 | 7.8 | 1.3 | 2.3 | 0.2 | 4.2  | 33.3  | 15.8 | 978.1  | 7.7  | 4.1  | 1084.4 | 116.6 | 103.4 |
|                    | Fresh  | Fresh  | None                     | whole    | 16.5 | 14.4 | 67.9 | 1.1 | 0.2 | 0.2 | 0.1 | 2.7  | 13.5  | 3.7  | 26.8   | 0.6  | 0.5  | 189.9  | 16.2  | 76.9  |
| T. rendalli        | Dried  | Smoked | None                     | body     | 62.9 | 28.0 | 8.2  | 2.8 | 0.9 | 2.6 | 0.1 | 7.7  | 19.0  | 8.4  | 304.8  | 7.2  | 2.8  | 806.3  | 70.6  | 111.1 |
|                    | Smoked | Smoked | None                     | body     | 62.9 | 28.0 | 8.2  | 2.8 | 0.9 | 2.6 | 0.1 | 7.7  | 19.0  | 8.4  | 304.8  | 7.2  | 2.8  | 806.3  | 70.6  | 111.1 |
|                    | Fresh  | Fresh  | None                     | filleted | 19.7 | 1.2  | 78.6 | 4.1 | 0.6 | 3.0 | 0.2 | 3.6  | 11.7  | 1.0  | 58.6   | 0.4  | 1.1  | 333.5  | 26.6  | 23.6  |
| T. sparrmanii<br>T | Dried  | Dry    | T. sparrmanii            | whole    | 59.7 | 14.0 | 9.0  | 3.9 | 0.3 | 1.0 | 0.8 | 8.1  | 31.1  | 9.2  | 4225.8 | 70.1 | 10.8 | 991.5  | 150.6 | 139.2 |
|                    | Smoked | Smoked | None                     | body     | 67.3 | 10.5 | 19.7 | 1.4 | 0.0 | 0.1 | 0.7 | 12.5 | 33.7  | 4.3  | 323.1  | 1.8  | 4.9  | 1116.8 | 84.3  | 105.6 |
|                    | Fresh  | Fresh  | T. Rendalli / sparrmanii | filleted | 19.7 | 1.2  | 78.6 | 4.1 | 0.6 | 3.0 | 0.1 | 2.3  | 9.2   | 1.5  | 54.9   | 0.4  | 1.0  | 226.1  | 21.5  | 132.2 |
| T                  | Dried  | Dry    | None                     | whole    | 59.7 | 14.0 | 9.0  | 3.9 | 0.3 | 1.0 | 0.8 | 8.1  | 31.1  | 9.2  | 4225.8 | 70.1 | 10.8 | 991.5  | 150.6 | 139.2 |
|                    | Smoked | Dry    | None                     | whole    | 59.7 | 14.0 | 9.0  | 3.9 | 0.3 | 1.0 | 0.8 | 8.1  | 31.1  | 9.2  | 4225.8 | 70.1 | 10.8 | 991.5  | 150.6 | 139.2 |

**Supplementary Table S3 (S4): Total frequency of species that were combined into one species**

| Species       | Freq. | Combined species | Freq. | New total |
|---------------|-------|------------------|-------|-----------|
| C. stappersii | 7     | Catfish          | 458   | 465       |
| C. multispine | 26    | Synodontis       | 53    | 79        |
| R. argentea   | 4     | L. miodon        | 133   | 137       |
| P. mueruensis | 26    | P. acutirosis    | 107   | 133       |
| S. robustus   | 10    | S. mellandi      | 79    | 89        |
| T. ruweti     | 10    | T. sparrmanii    | 543   | 553       |
